# Supplementary material for: Mechanistic insights into chromatin targeting by leukemic NUP98-PHF23 fusion
Source: PubMed Central journal article supplement (PMC7335091; doi:10.1038/s41467-020-17098-4), 2020-07-03
Supplement: 41467_2020_17098_MOESM1_ESM.pdf [file 41467_2020_17098_MOESM1_ESM.pdf]

## **Supplementary Information**

### **Mechanistic insights into chromatin targeting by leukemic NUP98-PHF23 fusion**

Yi Zhang, et al.

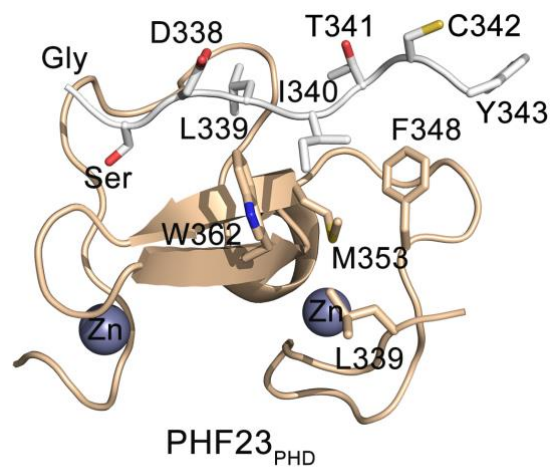

**Supplementary Figure 1.** Structure of PHF23<sub>PHD</sub>. The N-terminus of another PHF23<sub>PHD</sub> molecule (white; labeled) binds in the histone-binding site of the domain. The side chain of I340 occupies the aromatic cage. Gly and Ser residues derived from a vector are shown and labeled. Related to Figure 2.

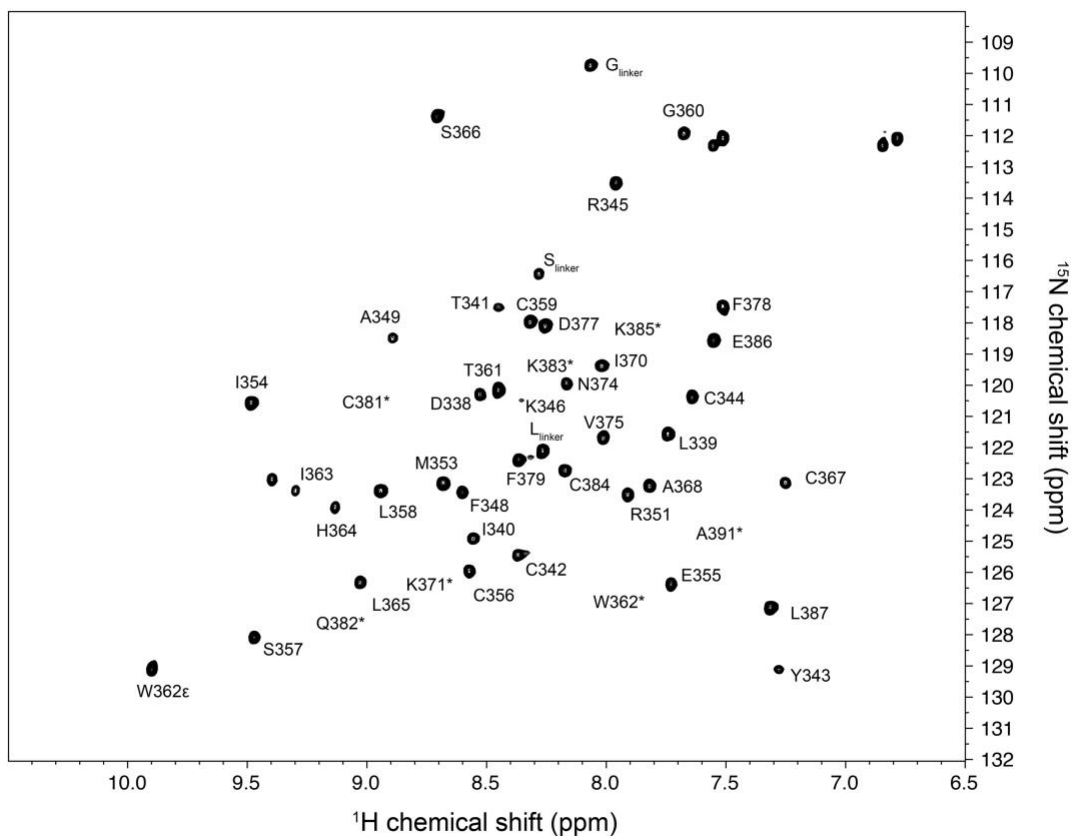

**Supplementary Figure 2. Backbone assignments of PHF23<sub>PHD</sub>.**  $^1\text{H},^{15}\text{N}$  HSQC spectrum of PHF23<sub>PHD</sub>. Backbone assignment of cross-peaks is shown using the one-letter code for amino acids. ‘\*’ indicates cross-peak invisible at the plotting level. ‘linker’ indicates cross-peaks from residues (GPLGS) derived from the vector. Related to Figures 1, 2 and 3.

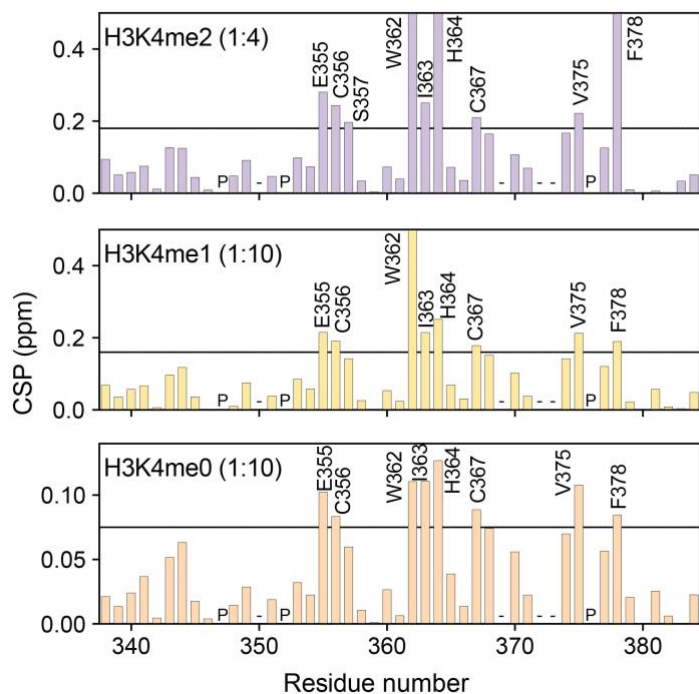

**Supplementary Figure 3. Recognition of histone H3 peptides by PHF23<sup>PHD</sup>.** Chemical shift perturbation (CSP) analysis of PHF23<sup>PHD</sup> upon binding of H3K4me2 (1:4, top), H3K4me1 (1:10, middle) and H3K4me0 (1:10, bottom) peptides. 'P' indicates a proline residue. '-' indicates unassigned residue. Bars reaching the maximum of y-axis indicate disappeared cross-peaks. Related to Figures 1 and 2.

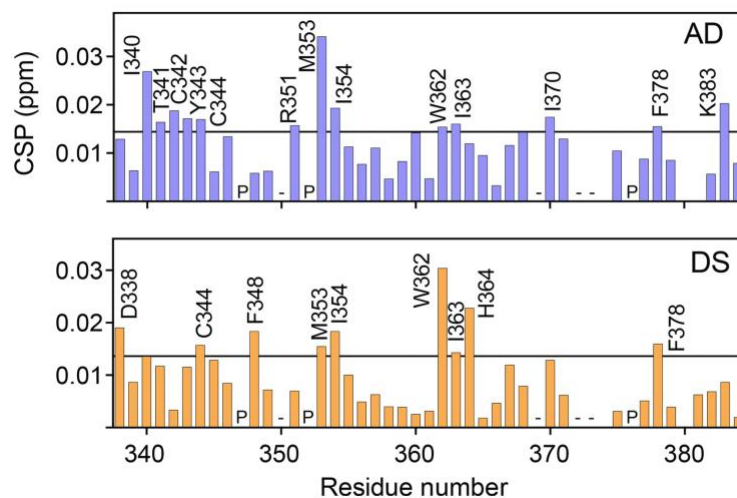

**Supplementary Figure 4. Characterization of AD and DS inhibitory mechanisms.** Chemical shift perturbation (CSP) analysis of the  $^1\text{H},^{15}\text{N}$  HSQC spectra of PHF23<sub>PHD</sub> at a 1:20 ratio of AD (purple) and 1:2 ratio of DS (orange). 'P' indicates a proline residue. '-' indicates an unassigned residue. Related to Figure 3.

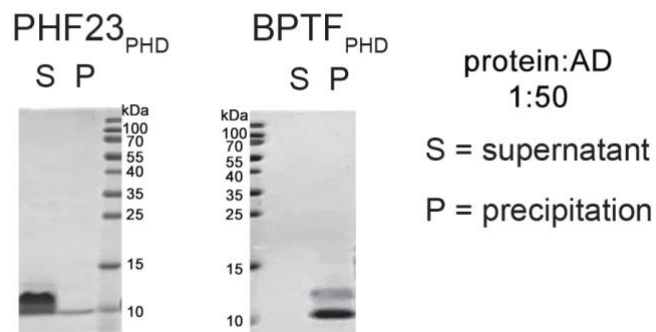

**Supplementary Figure 5.** Samples containing 0.1 mM PHF23<sub>PHD</sub> (left) and BPTF<sub>PHD</sub> (right) were incubated with AD at a protein:compound ratio of 1:50 and resolved by SDS-PAGE under non-reducing condition. 'S' and 'P' indicate supernatant and precipitation, respectively, after spinning the samples down. Experiment was repeated independently two times with similar results. Related to Figure 3.

**a**

| Sample                               | Read # (raw) |
|--------------------------------------|--------------|
| INPUT                                | 9860281      |
| H3K4me3                              | 8651824      |
| H3K27me3                             | 13855403     |
| NUP98-KDM5A (FLAG tagged) FLAG Rep#1 | 15101034     |
| FLAG Rep#2                           | 21301507     |

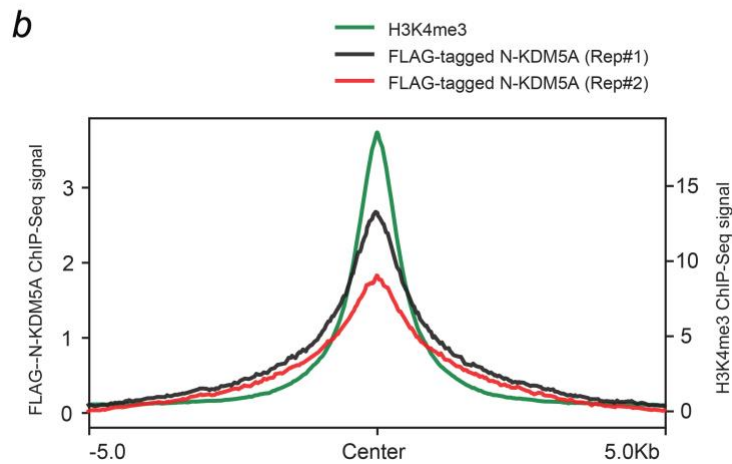

**Supplementary Figure 6. NUP98-KDM5A binding sites overlap with H3K4me3-loci.** (a). ChIP-seq read depths for the indicated sample. (b) Averaged H3K4me3 and NUP98-KDM5A ChIP-seq signals centered on H3K4me3 binding sites in a +/- 5.0-kb window in murine leukemia cells expressing FLAG-tagged NUP98-KDM5A. ChIP-seq signals were normalized to input. Related to Figures 5 and 6.

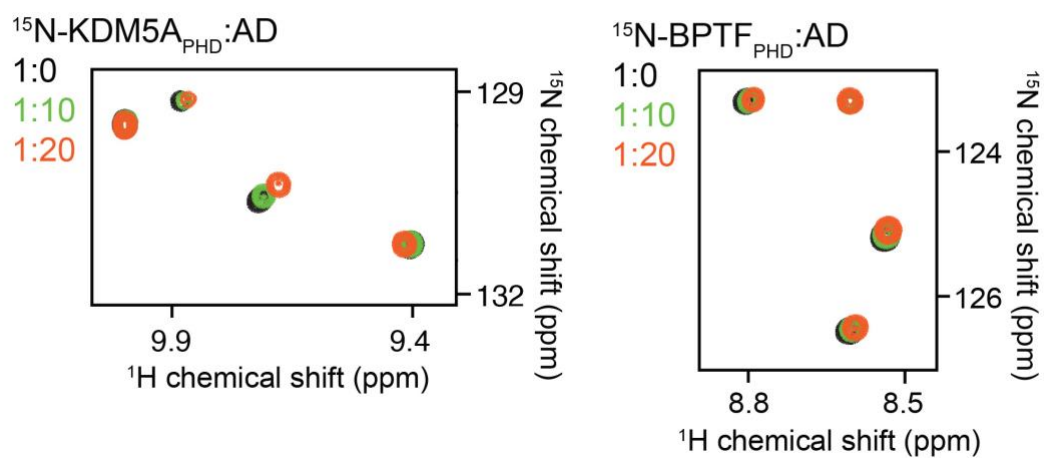

**Supplementary Figure 7. AD binds to KDM5A<sub>PHD</sub> and BPTF<sub>PHD</sub>.** Superimposed  $^1\text{H},^{15}\text{N}$  HSQC spectra of KDM5A<sub>PHD</sub> (left) and BPTF<sub>PHD</sub> (right) collected upon titration with AD. Spectra are color coded according to the protein:compound molar ratio. Related to Figures 5 and 6.



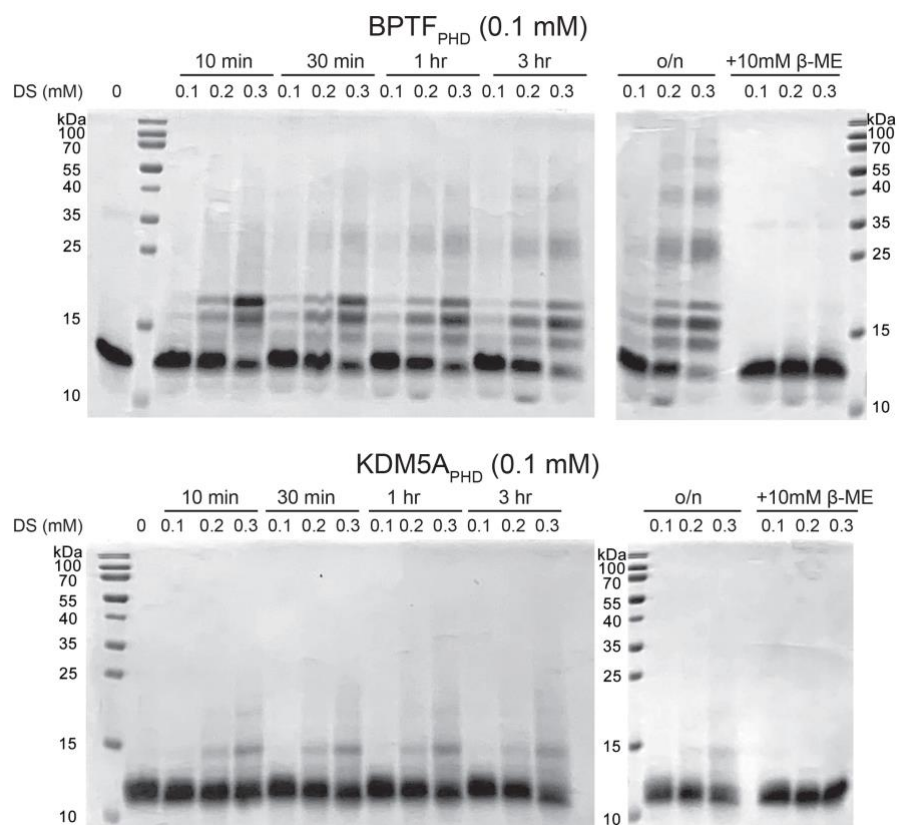

**Supplementary Figure 8.** Samples containing 0.1 mM BPTF<sub>PHD</sub> (top) and KDM5A<sub>PHD</sub> (bottom) were incubated with indicated amounts of DS for 10 min, 30 min, 1 hr, 3 hr, and overnight (o/n). All samples were flash-frozen and resolved by SDS-PAGE under non-reducing and reducing (10 mM β-ME) conditions. Experiment was repeated independently two times with similar results. Related to Figures 5 and 6.

**Supplementary Table 1.** Data collection and refinement statistics for PHF23<sub>PHD</sub>

| PHF23 PHD domain                                        |                                   |
|---------------------------------------------------------|-----------------------------------|
| <b>Data Collection</b>                                  |                                   |
| Space group                                             | P 4 <sub>1</sub> 2 <sub>1</sub> 2 |
| Wavelength (Å)                                          | 1.54                              |
| Resolution (Å)                                          | 50.0- 2.9 (3.0-2.9)*              |
| Unit-cell dimensions                                    |                                   |
| a, b, c (Å)                                             | 66.92, 66.92, 151.05              |
| α, β, γ (°)                                             | 90, 90, 90                        |
| No. of measured reflections                             | 27524                             |
| No. of unique reflections                               | 8025                              |
| Multiplicity                                            | 3.4 (3.0)                         |
| I/σ                                                     | 13.4 (1.9)                        |
| Completeness (%)                                        | 97.8 (97.1)                       |
| R <sub>sym</sub> # (%)                                  | 8.5 (49.4)                        |
| R <sub>pim</sub> # (%)                                  | 5.1 (32.2)                        |
| No. of molecules in ASU                                 | 5                                 |
| Matthews coefficient (Å <sup>3</sup> Da <sup>-1</sup> ) | 2.28                              |
| Solvent content (%)                                     | 46.1                              |
| <b>Refinement</b>                                       |                                   |
| R <sub>work</sub> /R <sub>free</sub> (%)                | 24.2/29.4                         |
| No. of atoms                                            |                                   |
| Protein                                                 | 1953                              |
| Ligand/ion                                              | 10                                |
| Water                                                   | 0                                 |
| B-factors (Å <sup>2</sup> )                             |                                   |
| Protein                                                 | 58.71                             |
| Ligand/ion                                              | 58.58                             |
| R.M.S.D                                                 | 84.36                             |
| Bond lengths (Å)                                        |                                   |
| Bond angles (°)                                         | 0.007                             |
| Ramachandran favored (%)                                | 0.989                             |
| Ramachandran allowed (%)                                | 95.0                              |
| Ramachandran outliers                                   | 5.0                               |
| Clashscore                                              | 0                                 |
| Clashscore                                              | 8.36                              |

\*Values in parentheses are for the highest resolution shell (Å).

#R<sub>sym</sub> =  $\sum |I_{\text{obs}} - I_{\text{avg}}| / I_{\text{avg}}$ , where I<sub>obs</sub> is intensity of any given reflection and I<sub>avg</sub> is the weighted mean I.

**Supplementary Table 2. List of primers used in this study.**

|     |                                        |
|-----|----------------------------------------|
| P1  | CGCGAATTCGATCTGATCACATGTTACTGTCTG      |
| P2  | CCGCTCGAGTTACAGTTCCTTGCATTTTC          |
| P3  | CTGGGATCCGATCTGATCGCATGTTACTGTCTGAAAG  |
| P4  | CTTTTCGACAGTAACATGCGATCAGATCGGATCCCAG  |
| P5  | ATCACATGTTACTGTCTAAAGCCCTTTGCAGGGCGG   |
| P6  | CCGCCCTGCAAAGGGCTTTAGACAGTAACATGTGAT   |
| P7  | GTTACTGTCTGAAAGCCCGCTGCAGGGCGGCCCATGAT |
| P8  | ATCATGGGCCGCCCTGCAGCGGGCTTTTCGACAGTAAC |
| P9  | CTTTGCAGGGCGGCCCGTGATTGAGTGCAGCCTGTGT  |
| P10 | ACACAGGCTGCACTCAATCACGGGCCGCCCTGCAAAG  |
| P11 | GCCCATGATTGAGTGCAGCATGTGTGGGACGTGGATTC |
| P12 | GAATCCACGTCCCACACATGCTGCACTCAATCATGGGC |
| P13 | CAGCCTGTGTGGGACGGCGATTACCTCTCCTGTGCT   |
| P14 | AGCACAGGAGAGGTGAATCGCCGTCCCACACAGGCTG  |
